# Supplementary material
Source: Springer Nature journal article supplement (https://www.springermedizin.de/resource/supplementary/12888_2012_1464_MOESM2_ESM.pdf/9480360)

**a.**

| Subjects | control |                    | CCFS    |                    |
|----------|---------|--------------------|---------|--------------------|
| method   | average | k-means clustering | average | k-means clustering |
| mean     | 193.37  | 135.82             | 173.48  | 124.55             |
| s.d.     | 14.727  | 6.0576             | 25.787  | 17.591             |

**b. Control**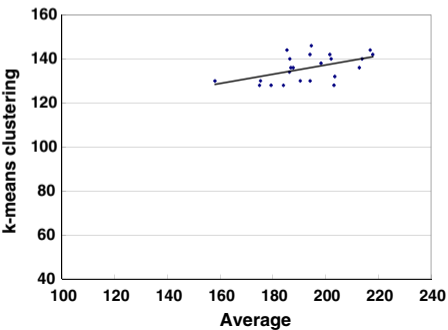**c. CCFS**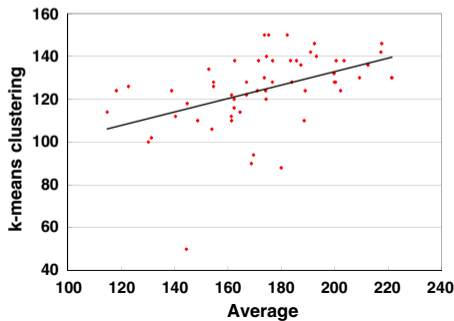

Supplement: MOESM2 [file 9480360]
